# Supplementary material
Source: PubMed Central journal article supplement (PMC5007591)
Supplement: supp_ddw059_ddw059supp_table1.pdf [file supp_ddw059_ddw059supp_table1.pdf]

| <u>Gene</u>    | <u>OMIM</u> | <u>Inheritance</u> | <u>Pt. Zygosity</u> | <u>Position</u> | <u>Nucleotide</u> | <u>Amino Acid</u> | <u>Parental Studies</u> | <u>Comment</u>                                                                                                                   |
|----------------|-------------|--------------------|---------------------|-----------------|-------------------|-------------------|-------------------------|----------------------------------------------------------------------------------------------------------------------------------|
| <i>DNM1L</i>   | 614388      | AD                 | Het                 | Chr12:32875536  | c.1048G>A         | p.G350R           | Mother 6-8% mosaicism   | Novel variant                                                                                                                    |
| <i>ACADSB</i>  | 610006      | AR                 | Het                 | Chr10:124812677 | c.1228+1G>A       | N/A               | Father heterozygous     | One variant detected (AR disorder)                                                                                               |
| <i>ACSF3</i>   | 614265      | AR                 | Het                 | Chr16:89199607  | c.1303G>T         | p.E435X           | Father heterozygous     | One variant detected (AR disorder)                                                                                               |
| <i>CLN8</i>    | 600143      | AR                 | Het                 | Chr8:1728557    | c.685C>G          | p.P229A           | ND                      | One variant detected (AR disorder)                                                                                               |
| <i>COQ9</i>    | 614654      | AR                 | Het                 | Chr16:57485113  | c.235C>T          | p.P79S            | ND                      | One variant detected (AR disorder)                                                                                               |
| <i>AH11</i>    | 608629      | AR                 | Het                 | Chr6:135778794  | c.989A>G          | p.D330G           | ND                      | One variant detected (AR disorder)                                                                                               |
| <i>DHFR</i>    | 613839      | AR                 | Het                 | Chr5:79950481   | c.68C>T           | p.S23F            | ND                      | One variant detected (AR disorder)                                                                                               |
| <i>SLC25A3</i> | 610773      | AR                 | Het                 | Chr12:98987859  | c.103G>C          | p.G35R            | ND                      | One variant detected (AR disorder)                                                                                               |
| <i>CHKB</i>    | 602541      | AR                 | Het                 | Chr22:51021197  | c.14C>T           | p.A5V             | ND                      | One variant detected (AR disorder)                                                                                               |
| <i>SLC6A3</i>  | 613135      | AR                 | Het                 | Chr5:1403128    | c.1676C>T         | p.A559V           | ND                      | One variant detected (AR disorder)                                                                                               |
| <i>PEX1</i>    | 214100      | AR                 | Het                 | Chr8:92129015   | c.2718+3G>A       | N/A               | ND                      | One variant detected (AR disorder)                                                                                               |
| <i>ALG13</i>   | 601110      | XL                 | Hem                 | ChrX:110970229  | c.1922A>G         | p.H641R           | Mother heterozygous     | Patient had normal N-glycan analysis                                                                                             |
| <i>MECP2</i>   | 300672      | XL                 | Hem                 | ChrX:153296146  | c.1133C>T         | p.A378V           | Mother heterozygous     | Most variants X-linked dominant; Male with same variant seen in ExAC data; "benign clinical significance in ClinVar; rs201314910 |
