# Supplementary material
Source: PubMed Central journal article supplement (PMC5007591)
Supplement: supp_ddw059_ddw059supp_table2.pdf [file supp_ddw059_ddw059supp_table2.pdf]

| <u>Gene</u>     | <u>OMIM</u>    | <u>Inheritance</u> | <u>Pt. Zygoty</u> | <u>Position</u> | <u>Nucleotide</u> | <u>Amino Acid</u> | <u>Parental Studies</u> | <u>Comment</u>                                                                                                             |
|-----------------|----------------|--------------------|-------------------|-----------------|-------------------|-------------------|-------------------------|----------------------------------------------------------------------------------------------------------------------------|
| <i>DNM1L</i>    | 614388         | AD                 | Het               | Chr12:32884003  | c.1135G>A         | p.E379K           | <i>De novo</i>          | Novel variant                                                                                                              |
| <i>PDHAI</i>    | 312170; 308930 | XL                 | Het               | ChrX:19371229   | c.448G>A          | p.G150R           | <i>De novo</i>          | Novel variant                                                                                                              |
| <i>SMARCA2</i>  | 601358         | AD                 | Het               | Chr9:2161785    | c.4081G>Y         | p.V1361I          | Mother heterozygous     | Mother also heterozygous                                                                                                   |
| <i>FARS2</i>    | 614946         | AR                 | Het               | Chr6:5369309    | c.506A>T          | p.D169V           | ND                      | One variant detected (AR disorder); variant seen in 15/3723 European American and 0/7020 African American in ESP5400 data. |
| <i>CI2orf65</i> | 613559; 615035 | AR                 | Het               | Chr12:123738477 | c.256C>A          | p.H86N            | ND                      | One variant detected (AR disorder)                                                                                         |
| <i>ICK</i>      | 612651         | AR                 | Het               | Chr6:52878698   | c.914A>C          | p.K305T           | ND                      | One variant detected (AR disorder)                                                                                         |
| <i>GAA</i>      | 232300         | AR                 | Het               | Chr17:78078606  | c.221G>A          | p.R74H            | ND                      | One variant detected (AR disorder)                                                                                         |
| <i>NDUFS1</i>   | 252010         | AR                 | Het               | Chr2:207003310  | c.1291C>G         | p.L431V           | ND                      | One variant detected (AR disorder); variant seen in 3/3735 European American and 39/6981 African American in ESP5400       |
